# Supplementary material
Source: MDPI journal article supplement (https://www.mdpi.com/2073-4395/13/10/2497)
Supplement: s1 [file s1]

Table S1: Weather Data of Experimental Site for 2021 and 2022 Cropping Seasons at Nyankpala, Ghana

| Month     | Mean Monthly Rainfall<br>(mm) |      | Mean Monthly<br>Temperature (°C) |      | Mean Monthly Relative<br>Humidity (%) |      |
|-----------|-------------------------------|------|----------------------------------|------|---------------------------------------|------|
|           | 2021                          | 2022 | 2021                             | 2022 | 2021                                  | 2022 |
| January   | 0.0                           | 0.0  | 29.0                             | 27.4 | 34.2                                  | 37.1 |
| February  | 0.0                           | 0.0  | 29.7                             | 30.7 | 25.7                                  | 41.2 |
| March     | 18.5                          | 0.9  | 32.7                             | 32.4 | 30.9                                  | 58.1 |
| April     | 25.5                          | 5.8  | 32.6                             | 29.9 | 29.9                                  | 72.0 |
| May       | 12.0                          | 3.2  | 30.2                             | 29.1 | 32.9                                  | 76.4 |
| June      | 20.4                          | 5.1  | 28.6                             | 28.0 | 38.1                                  | 82.5 |
| July      | 8.5                           | 5.1  | 27.0                             | 26.6 | 44.8                                  | 88.2 |
| August    | 16.0                          | 11.4 | 26.9                             | 25.9 | 46.2                                  | 85.3 |
| September | 12.3                          | 9.3  | 27.0                             | 26.2 | 46.3                                  | 84.0 |
| October   | 8.5                           | 2.1  | 28.4                             | 27.5 | 46.1                                  | 84.7 |
| November  | 18.1                          | 0.0  | 29.4                             | 28.6 | 44.5                                  | 78.3 |
| December  | 0.0                           | 0.0  | 28.2                             | 27.6 | 30.7                                  | 76.4 |

Table S2: Profitability for Cowpea Production at Different OFA application - VCR

| Year                                  | 2021          |                    |                | 2022           |                    |                | Mean yield (2021&2022) |                    |                |
|---------------------------------------|---------------|--------------------|----------------|----------------|--------------------|----------------|------------------------|--------------------|----------------|
|                                       | Treatments    |                    |                | Treatments     |                    |                | Treatments             |                    |                |
|                                       | Control       | Foliar Application | Soil Drenching | Control        | Foliar Application | Soil Drenching | Control                | Foliar Application | Soil Drenching |
| <b>Gross Income (per ha)</b>          |               |                    |                |                |                    |                |                        |                    |                |
| Average Yield (kg)                    | 873           | 1120               | 1265           | 854            | 1114               | 1416           | 863                    | 1117               | 1341           |
| Adjusted Yield (kg) @10%              | 785.7         | 1008               | 1138.5         | 768.6          | 1002.6             | 1274.4         | 776.7                  | 1005.3             | 1206.9         |
| Price (US \$ /kg)                     | 1.24          | 1.24               | 1.24           | 1.45           | 1.45               | 1.45           | 1.35                   | 1.35               | 1.35           |
| <b>Gross Revenue (US \$)</b>          | <b>978.05</b> | <b>1254.77</b>     | <b>1417.22</b> | <b>1116.22</b> | <b>1456.06</b>     | <b>1850.79</b> | <b>1047.42</b>         | <b>1355.70</b>     | <b>1627.56</b> |
| <b>Variable Cost items (US \$/ha)</b> |               |                    |                |                |                    |                |                        |                    |                |
| Seed cost                             | 34.58         | 34.58              | 34.58          | 34.58          | 34.58              | 34.58          | 34.58                  | 34.58              | 34.58          |
| Ploughing cost                        | 27.66         | 27.66              | 27.66          | 41.49          | 41.49              | 34.58          | 34.58                  | 34.58              | 34.58          |
| Planting Cost                         | 34.58         | 34.58              | 34.58          | 41.49          | 41.49              | 41.49          | 38.04                  | 38.04              | 38.04          |
| Weeding Cost                          | 34.58         | 34.58              | 34.58          | 48.41          | 48.41              | 48.41          | 41.49                  | 41.49              | 41.49          |
| OFA Application                       | 0.00          | 20.75              | 29.05          | 0.00           | 20.75              | 30.43          | 0.00                   | 20.75              | 29.74          |
| Pest control                          | 27.66         | 27.66              | 27.66          | 33.20          | 33.20              | 33.20          | 30.43                  | 30.43              | 30.43          |
| Harvesting cost                       | 34.58         | 34.58              | 34.58          | 48.41          | 48.41              | 48.41          | 41.49                  | 41.49              | 41.49          |
| Post Harvesting Cost                  | 27.66         | 27.66              | 27.66          | 31.12          | 31.12              | 31.12          | 29.39                  | 29.39              | 29.39          |
| Insecticides Cost                     | 44.26         | 44.26              | 44.26          | 52.56          | 52.56              | 52.56          | 48.41                  | 48.41              | 48.41          |
| Cost of OFA                           | 0.00          | 7.61               | 11.41          | 0.00           | 7.61               | 11.41          | 0.00                   | 7.61               | 11.41          |
| Transportation(carting)               | 20.75         | 20.75              | 20.75          | 27.66          | 27.66              | 27.66          | 24.20                  | 24.20              | 24.20          |
| <b>Total Variable Cost</b>            | <b>286.31</b> | <b>314.66</b>      | <b>326.76</b>  | <b>358.92</b>  | <b>387.28</b>      | <b>400.76</b>  | <b>322.61</b>          | <b>350.97</b>      | <b>363.76</b>  |
| <b>Total Fixed Cost (US \$)</b>       | 138.31        | 138.31             | 138.31         | 138.31         | 138.31             | 138.31         | 138.31                 | 138.31             | 138.31         |
| <b>Total Cost (US \$)</b>             | <b>424.62</b> | <b>452.97</b>      | <b>465.08</b>  | <b>497.23</b>  | <b>525.59</b>      | <b>539.07</b>  | <b>460.93</b>          | <b>489.28</b>      | <b>502.07</b>  |
| <b>Net Profit (US \$/ha)</b>          | <b>553.43</b> | <b>801.80</b>      | <b>924.48</b>  | <b>618.99</b>  | <b>930.47</b>      | <b>1311.72</b> | <b>586.49</b>          | <b>866.41</b>      | <b>1125.49</b> |
| <b>Value: Cost Ratio (VCR)</b>        | <b>1.3</b>    | <b>1.77</b>        | <b>2.05</b>    | <b>1.24</b>    | <b>1.77</b>        | <b>2.43</b>    | <b>1.27</b>            | <b>1.77</b>        | <b>2.24</b>    |

Note: US \$1 = GH¢7.23 (Bank of Ghana, 2022). Control is the farmer Practice

Table S3: Pearson's Correlation Coefficients for on Cowpea Productivity Parameters and Soil Health Indicators

| Parameters     | Shoot DM | Root DM   | Nodule Mass | Pod Yield | Grain Yield | Stover Yield | PHI       | HI        | Soil pH   | APHASE    | ADASE    | ASHASE    | DHASE     | GMEA      | POXC      | Av. P     | A. N      | MBN      | PMN      | Cum._Evol. CO2 |
|----------------|----------|-----------|-------------|-----------|-------------|--------------|-----------|-----------|-----------|-----------|----------|-----------|-----------|-----------|-----------|-----------|-----------|----------|----------|----------------|
| Root DM        | 0.649*   |           |             |           |             |              |           |           |           |           |          |           |           |           |           |           |           |          |          |                |
| Nodule Mass    | 0.776*   | 0.552 ns  |             |           |             |              |           |           |           |           |          |           |           |           |           |           |           |          |          |                |
| Pod Yield      | 0.846*   | 0.469 ns  | 0.822*      |           |             |              |           |           |           |           |          |           |           |           |           |           |           |          |          |                |
| Grain Yield    | 0.727*   | 0.251 ns  | 0.645*      | 0.943*    |             |              |           |           |           |           |          |           |           |           |           |           |           |          |          |                |
| Stover Yield   | 0.535 ns | 0.694*    | 0.628*      | 0.344 ns  | 0.065 ns    |              |           |           |           |           |          |           |           |           |           |           |           |          |          |                |
| PHI            | 0.398 ns | 0.024 ns  | 0.436 ns    | 0.566 ns  | 0.582 *     | 0.269 ns     |           |           |           |           |          |           |           |           |           |           |           |          |          |                |
| HI             | 0.226 ns | -0.310 ns | 0.020 ns    | 0.507 ns  | 0.708*      | -0.508 ns    | 0.317 ns  |           |           |           |          |           |           |           |           |           |           |          |          |                |
| Soil pH        | 0.543 ns | 0.164 ns  | 0.478 ns    | 0.433 ns  | 0.478 ns    | 0.169 ns     | 0.355 ns  | 0.079 ns  |           |           |          |           |           |           |           |           |           |          |          |                |
| APHASE         | 0.675*   | 0.212 ns  | 0.812*      | 0.867*    | 0.841*      | 0.216 ns     | 0.345 ns  | 0.468 ns  | 0.545 ns  |           |          |           |           |           |           |           |           |          |          |                |
| ADASE          | 0.696 *  | 0.394 ns  | 0.831 *     | 0.765*    | 0.581*      | 0.588*       | 0.354 ns  | 0.133 ns  | 0.297 ns  | 0.803*    |          |           |           |           |           |           |           |          |          |                |
| ASHASE         | 0.633*   | 0.211 ns  | 0.730 *     | 0.807 *   | 0.820*      | 0.221 ns     | 0.308 ns  | 0.435 ns  | 0.528 ns  | 0.941 *   | 0.705 *  |           |           |           |           |           |           |          |          |                |
| DHASE          | 0.601*   | 0.026 ns  | 0.330 ns    | 0.645 *   | 0.714 *     | 0.138 ns     | 0.697 *   | 0.576*    | 0.283 ns  | 0.433 ns  | 0.347 ns | 0.483 ns  |           |           |           |           |           |          |          |                |
| GMEA           | 0.766 *  | 0.259 ns  | 0.810 *     | 0.907 *   | 0.866*      | 0.345 ns     | 0.472 ns  | 0.460 ns  | 0.499 ns  | 0.953 *   | 0.852*   | 0.938 *   | 0.631*    |           |           |           |           |          |          |                |
| POXC           | 0.229 ns | -0.126 ns | 0.140 ns    | 0.538 ns  | 0.755*      | -0.536 *     | 0.157 ns  | 0.842 *   | 0.254 *   | 0.572 *   | 0.085 ns | 0.603*    | 0.400 ns  | 0.491 ns  |           |           |           |          |          |                |
| A._P           | 0.275 ns | 0.371 ns  | 0.470 ns    | 0.296 ns  | 0.138 ns    | 0.627 ns     | -0.114 ns | -0.214 ns | 0.024 ns  | 0.408 ns  | 0.473 ns | 0.495 ns  | 0.059 ns  | 0.441 ns  | -0.134 ns |           |           |          |          |                |
| A. N           | -0.646 * | -0.761 *  | -0.802 *    | -0.760 *  | -0.568 *    | -0.641*      | -0.273 ns | 0.016 ns  | -0.112 ns | -0.611*   | -0.718 * | -0.606 *  | -0.211 ns | -0.645 ns | -0.137 ns | -0.597 *  |           |          |          |                |
| MBN            | 0.589 *  | 0.154 ns  | 0.577*      | 0.872*    | 0.934*      | -0.075 ns    | 0.574 ns  | 0.716*    | 0.412 ns  | 0.781*    | 0.536 ns | 0.678 *   | 0.614 *   | 0.761*    | 0.763*    | -0.058 ns | -0.458 ns |          |          |                |
| PMN            | -0.676*  | -0.784*   | -0.785*     | -0.669*   | -0.433 ns   | -0.748 *     | -0.286 ns | 0.174 ns  | -0.093 ns | -0.490 ns | -0.739 * | -0.462 ns | -0.287 ns | -0.585*   | 0.051 ns  | -0.465 ns | 0.860 *   | -0.400 * |          |                |
| Cum._Evol. CO2 | 0.653*   | 0.575*    | 0.677*      | 0.571*    | 0.312 ns    | 0.862*       | 0.491 ns  | -0.173 ns | 0.126 ns  | 0.368 ns  | 0.760 *  | 0.278 ns  | 0.373 ns  | 0.516 ns  | -0.361 ns | 0.475 ns  | -0.689 *  | 0.225 ns | -0.744 * |                |
| Cum._Min. C    | 0.565 ns | 0.337 ns  | 0.590 *     | 0.580 *   | 0.364 ns    | 0.665*       | 0.504 ns  | 0.091 ns  | -0.025 ns | 0.406 ns  | 0.753*   | 0.258 ns  | 0.478 ns  | 0.542 ns  | -0.221 ns | 0.392 ns  | -0.540 ns | 0.348 ns | -0.635*  | 0.722*         |

Note: Values with (\*) starlike symbols indicate different at significance at  $p = 0.05$ . ns = not significantly different at  $p = 0.05$  Pod\_Yield = pod yield; Grain\_Yield = grain yield; Nodule\_Mass = nodule mass; GMEA = geometric mean enzyme activity; ASHASE= arylsulphatase; DHASE =dehydrogenase, APHASE = acid phosphatase; ADASE = alpha glucosidase; Soil\_pH = soil pH; POXC = permanganate oxidizable C; PHI = pod harvest index; HI = harvest

index; Stover\_Yield = Stover yield; Root\_DM = Root dry matter; Av P = available phosphorus, Cumu\_Evolv\_CO2 = cumulative evolved CO2; Cumu\_Min. C = Cumulative mineralizable C; AV\_P = available phosphorus. Microbial biomass nitrogen, A\_N = available N (NH4+-N+NO3--N); PMN = potentially mineralizable N. The plant parameters used for Pearson correlation were means of two-years.
